# Supplementary material for: Insight into Nephrocan Function in Mouse Endoderm Patterning
Source: PubMed Central journal article supplement (PMC6981620; doi:10.3390/ijms21010008), 2019-12-18
Supplement: ijms-21-00008-s001.pdf [file ijms-21-00008-s001.pdf]

## Supplementary Information

Article

# Insight into *Nephrocan* Function in Mouse Endoderm Patterning

Martina Addeo<sup>1,2</sup>, Silvia Buonaiuto<sup>2</sup>, Iliaria Guerriero<sup>1</sup>, Elena Amendola<sup>2,3</sup>, Feliciano Visconte<sup>4</sup>, Antonio Marino<sup>2</sup>, Maria Teresa De Angelis<sup>1</sup>, Filomena Russo<sup>1</sup>, Luca Roberto<sup>1</sup>, Pina Marotta<sup>1</sup>, Nicola Antonino Russo<sup>1</sup>, Anna Iervolino<sup>1</sup>, Federica Amodio<sup>1</sup>, Mario De Felice<sup>3</sup>, Valeria Lucci<sup>2,3,\*</sup>, † and Geppino Falco<sup>1,2,3,\*</sup>, †

<sup>1</sup> Istituto di Ricerche Genetiche “G. Salvatore”, Biogem s.c.ar.l, Ariano Irpino, 83031 Avellino, Italy; martina.addeo@gmail.com (M.A.); ilaria.guerriero.ig@gmail.com (I.G.); mariateresadeangelis211285@gmail.com (M.T.D.A.); filomena\_russo1982@libero.it (F.R.); luca.roberto@biogem.it (L.R.); russonico@gmail.com (N.A.R.); pinamarotta82@gmail.com (P.M.); amodio.federica@yahoo.it (F.A.); anna.iervolino@biogem.it (A.I)

<sup>2</sup> Dipartimento di Biologia, Università degli Studi di Napoli “Federico II”, 80126 Napoli, Italy; buonaiutosilvia@gmail.com (S.B.); antoniomarmail@gmail.com (A.M.);

<sup>3</sup> Istituto per l’Endocrinologia e l’Oncologia Sperimentale “G. Salvatore”, CNR, 80131 Napoli, Italy; mario.defelice@unina.it (M.D.F.); elena.amendola@unina.it (E.A.)

<sup>4</sup> CEINGE Biotecnologie Avanzate s.c.a.r.l., 80131 Napoli, Italy; visconte@ceinge.unina.it (F.V.)

\* Correspondence: valeria.lucci@unina.it (V.L.); geppino.falco@unina.it (G.F.); Tel.: +39-081-679083 (V.L.); +39-081-679092 (G.F.)

† These authors contributed equally to this work

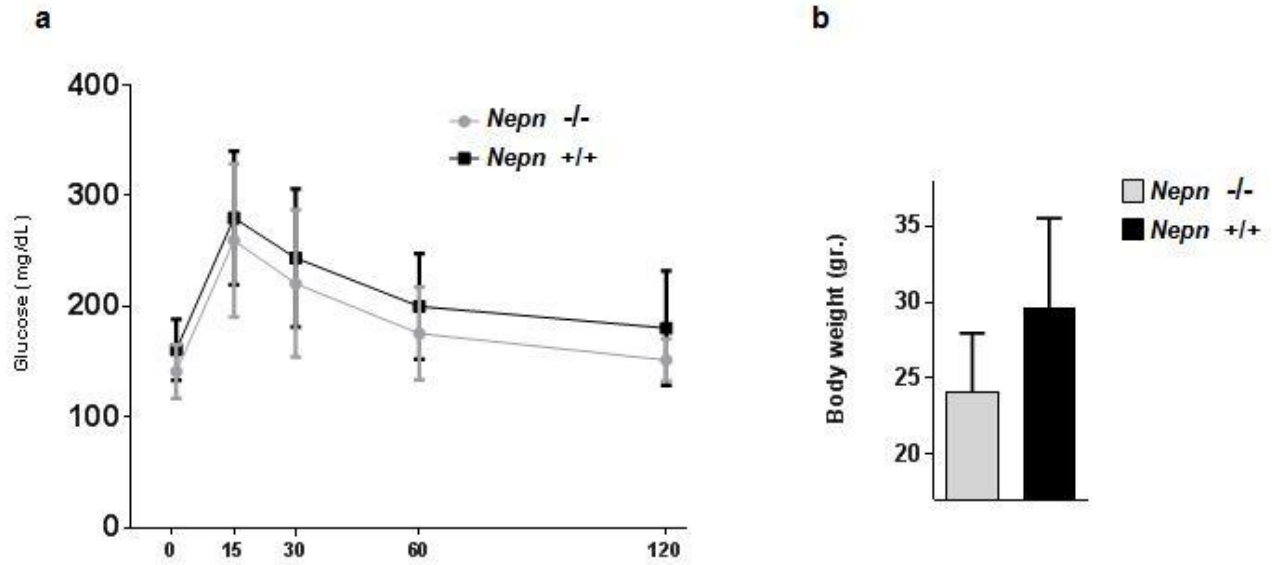

**Supplementary Figure S1:** Pancreatic functionality. **a)** Intra-peritoneal Glucose Tolerance Test (IPGTT). Evaluation of blood glucose of *Nepn*<sup>-/-</sup> mice compared to *Nepn*<sup>+/+</sup> in a group of 7-12 months old mice. In figure, blood glucose levels are represented at 0, 15, 30, 60 and 120 minutes from the glucose administration (*Nepn*<sup>+/+</sup>: 7 mice; *Nepn*<sup>-/-</sup>: 7 mice). **b)** Evaluation of mouse body weight of *Nepn*<sup>-/-</sup> compared to *Nepn*<sup>+/+</sup> mice during time life in a group of 7-12 months old mice.

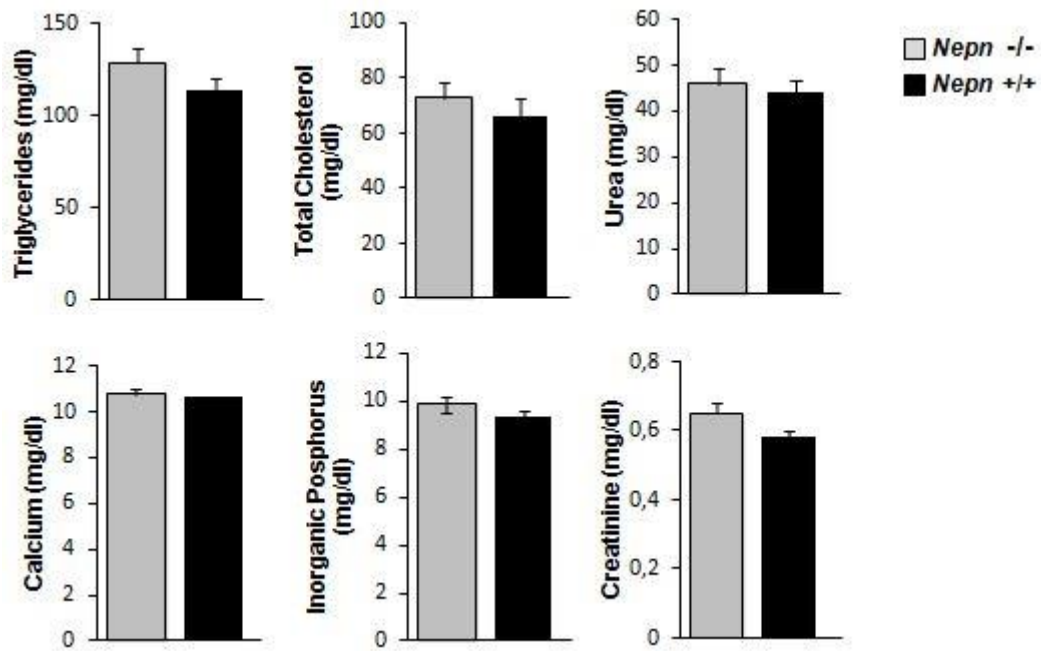

**Supplementary Figure S2:** Serum levels parameters in a group of 4-6 months old mice. Triglycerides, total cholesterol, urea, calcium and phosphorus were measured - no significant differences between *Nepn*<sup>+/+</sup> and *Nepn*<sup>-/-</sup> mice can be observed.

MHPLWAFLLG LSLTNGLSAN CPGRCSDDSM QSVQCYRLME FLPPPRDSTL ATAESSTFSY LTSLDCWLWK ILFCWPVEQS 80  
 LLKMTPSKL\* VH\*RL\*NFGK IN\*DKSPVLS QPTLRC\*N\*M IMPYVLYVDQ SLKD\*RT\*KS LNLKTT\*SRP CLPACSPHLP 160  
 VCRV\*WWMVT T\*SPWLDL\*A FRISST\*AWR TTNSTLYQGM SSLPYRICSS SVSVVIF\*LK FP\*IYPNPCI L\*RWRETSSK 240  
 WSGFAI\*NTW RTCPIFTCQR TSCLPLMGHS S\*PI\*QLWRF PKTSFKCCLP GYHRGYRSLI VAVTSFRE\*Q HQNSRTSET\* 320  
 NICF\*TTMLS ACSRLGPFRG VLSCPTWPWS RICCCLSL\*G SLRPWPGWTS RAMPSTRWLK GSSGTSNNCR SSTSGETTGSR 400  
 P\*ISRHWRC LGSGISTWVG IPGTALAVSY EPGKS\*RPRA RT\*KGDSAQP QQSDRGRAGC PRRS\*GNVS ITYSRVRKAK 480  
 RPRRNPNPKT LPASDSTWMT TMTIMK\*I 508

**Supplementary Figure S3:** In *Neprn*<sup>-/-</sup> mESCs a frameshift mutation generates several stop codons (indicated as \*) thus inhibiting protein synthesis.

Supplementary Table S1: Experimental study of renal functionality. Evaluation of urinary parameters in 24h urine output of *Neprn*<sup>-/-</sup> mice compared to *Neprn*<sup>+/+</sup> in a group of 7-12 months old mice.

| Urinary Parameters                        | <i>Neprn</i> <sup>+/+</sup> | <i>Neprn</i> <sup>-/-</sup> |
|-------------------------------------------|-----------------------------|-----------------------------|
| Urinary Volume (ml)                       | 2.14±0.78                   | 2.36±0.69                   |
| Creatinine excretion (µmol/g body weight) | 0.26±0.02                   | 0.26±0.03                   |
| Na <sup>+</sup> / creatinine              | 27.42±2.78                  | 24.01±3.15                  |
| K <sup>+</sup> / creatinine               | 27.92±2.91                  | 34.66±4.40                  |
| Cl <sup>-</sup> / creatinine              | 59.53±6.24                  | 51.50±5.63                  |
| Creatinine clearance                      | 120.59±8.83                 | 113.65±15.73                |

Supplementary Table S2: RT-PCR and qRT-PCR primers (5'-3')

| Gene Name                 | Forward Primer 5'-3'         | Reverse Primer 5'-3'     |
|---------------------------|------------------------------|--------------------------|
| <i>Cxcr4</i>              | gtaaccaccacggctgtaga         | agtagatggtggcaggaag      |
| <i>Gapdh</i>              | cggagtcacggatttgctgat        | gaagatggtgatgggcttc      |
| <i>Gata2</i>              | agctcatgactatggcagca         | ccggttctgtccattcatct     |
| <i>Nanog</i>              | aaccagtgggtgaagactagcaatggtc | ttccagatgcgttcaccagatagc |
| <i>NeuroD</i>             | gctccagggttatgagatcg         | ctctgattcatggcttcaa      |
| <i>Oct4</i>               | ccgtgtgaggtggagtctggagac     | cgccggttacagaaccatactcg  |
| <i>Foxa2</i>              | ctgggagccgtgaagatggaag       | tccagcgcacataggatg       |
| <i>Gata4</i>              | tcaaacagaaaacggaagc          | ctgctgtgccatagtgaga      |
| <i>Gata6</i>              | caccatcaccgacctactc          | gcatgattgcacaggtaat      |
| <i>Sox9</i>               | ggtctgcctggactgtatgtggatg    | ctgtccgatgtctctctgcaggag |
| <i>Hnf6</i>               | caaagagggtggcagcgtatc        | gctcttccgtttgcaggctg     |
| <i>Nkx6.1</i>             | gacagcaaatcttcgacctgg        | tttccgaagtccccttgagcc    |
| <i>Rex1</i>               | cagaagaagcaggatcgctc         | gccactgtctttgccgtttc     |
| <i>Neprn</i> Iso B        | gatgcagttgtgattctatgc        | tagactctgttccactggc      |
| <i>Neprn</i> Iso B (2)    | aacctgtgttggacaatgc          | gtgctgcaaggcgattaagt     |
| <i>Neprn</i> Iso A        | agatccttctctgcaatgtgaac      | tcttccagaccaacagctcc     |
| <i>Neprn</i> Iso A (2)    | agatccttctctgcaatgtgaac      | gtgctgcaaggcgattaagt     |
| <i>Neprn_b</i> FR         | tgtgattctatgagctgtgaca       | ggattctgtctggctaatg      |
| <i>Neprn</i> Crispr F3-R2 | aaaagattctgtatcagactccg      | cgagggtcctctggataggaagc  |
| <i>Neprn</i> Crispr Del   | tcatggaactcccatcaggc         | tagactctgttccactggc      |
| <i>Neprn</i> Crispr Ko    | ctcatggaattccttccacc         | tagactctgttccactggc      |
| Cds-Neo                   | gggatctcatgctggagtctctcg     | agaattccccttccatctgctcc  |
| Bax1b-5'                  | tggtagacattttagatt           | agaattccccttccatctgctcc  |
| <i>lacZ</i>               | gggatctcatgctggagtctctcg     | agaattccccttccatctgctcc  |

|                    |                       |                      |
|--------------------|-----------------------|----------------------|
| <i>lacZ</i> -(Cre) | cgtcagtatcggcggaattcc | tccccttcacatctgectcc |
| Int1               | gaaactttcacagtatgg    | tccccttcacatctgectcc |

Supplementary Table S3: PCR condition used in the study

| Genes                                                                               | Denaturation<br>(temp./duration) | Cyclic Denaturation,<br>Annealing and<br>Elongation<br>(temp./duration)                                                  | No. of Cycles                 | Final Elongation<br>and Cooling<br>(temp./duration)        |
|-------------------------------------------------------------------------------------|----------------------------------|--------------------------------------------------------------------------------------------------------------------------|-------------------------------|------------------------------------------------------------|
| <i>Nepn</i> -202<br><i>Nepn</i> -201<br><i>Gapdh</i> (Fig. 1b)                      | 95°C/5 minutes                   | 95 °C/30 seconds<br>58 °C/20 seconds<br>72 °C/45 seconds                                                                 | 35                            | 72 °C/5 minutes<br>4 °C/∞                                  |
| <i>Nepn</i> isoform a<br><i>Nepn</i> isoform b<br><i>Gapdh</i> (Fig. 2b,<br>3d, 6b) | 95°C/5 minutes                   | 95 °C/15 seconds<br>55 °C/15 seconds<br>72 °C/20 seconds                                                                 | 38                            | 72 °C/5 minutes<br>4 °C/∞                                  |
| <b>Recombinant<br/>allele<br/>Wild-type<br/>allele (Fig. 3b)</b>                    | 95°C/5 minutes                   | 95 °C/15 seconds<br>60 °C/30 seconds<br>72 °C/45 seconds<br><br>95 °C/15 seconds<br>50 °C/30 seconds<br>72 °C/45 seconds | 10<br>(-1°C/cycles)<br><br>30 | 72 °C/5 minutes<br>4 °C/∞<br><br>72 °C/5 minutes<br>4 °C/∞ |
| <i>Nepn</i> isoform b<br><i>Nepn</i> isoform b<br>(Fig. 6b)                         | 95°C/5 minutes                   | 95°C/30 seconds<br>58°C/15 seconds<br>72°C/15 seconds                                                                    | 38                            | 72 °C/5 minutes<br>4 °C/∞                                  |

Supplementary Table S2: RT-PCR and qRT-PCR primers (5'-3')

Full gel image for Fig. 1b

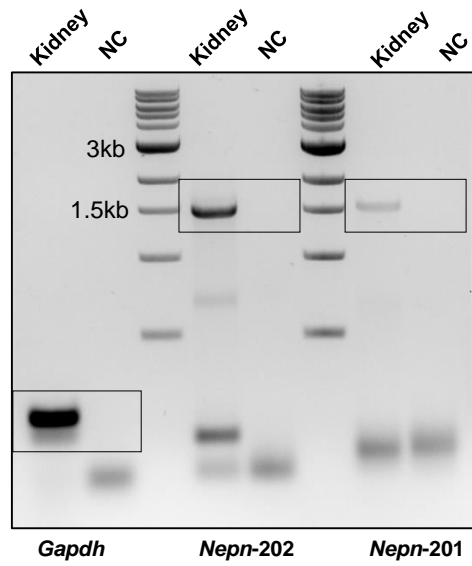

Full gel images for Fig. 2a

NA=Not Applicable

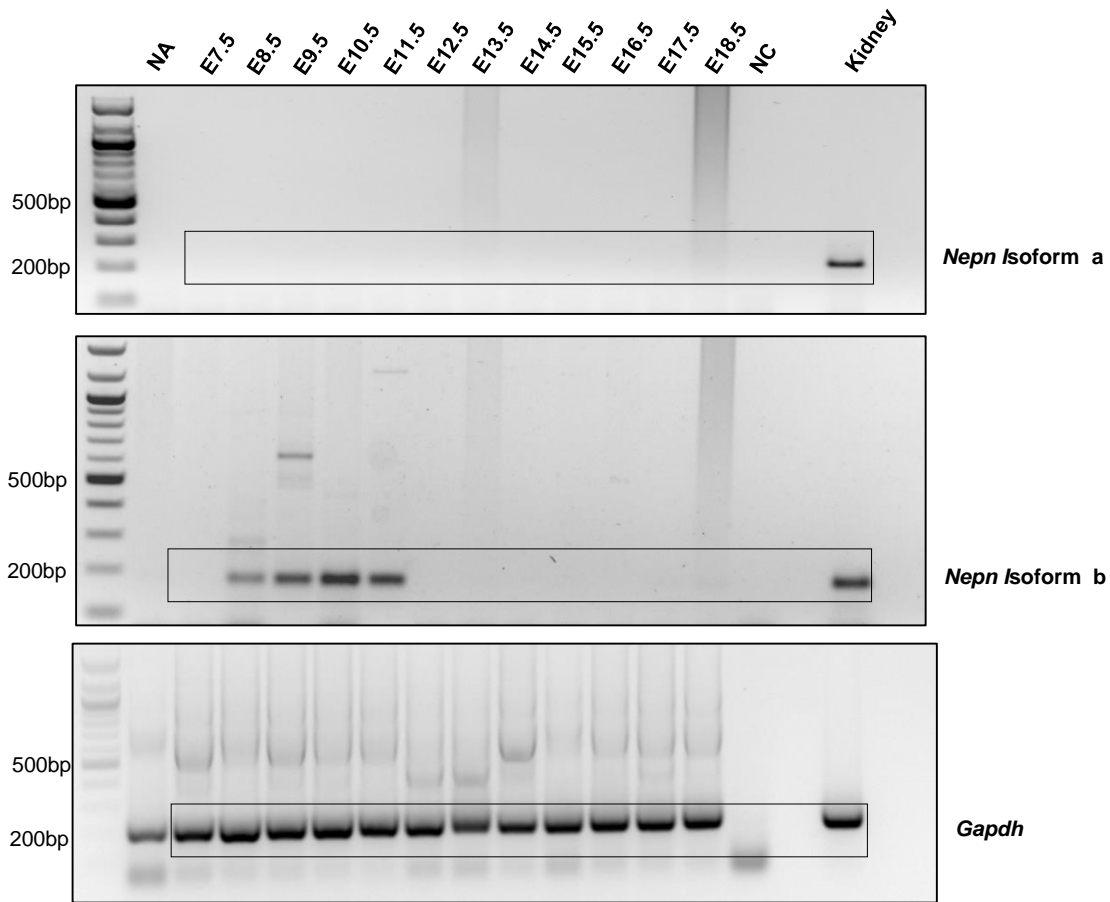

Full gel images for Fig. 2b

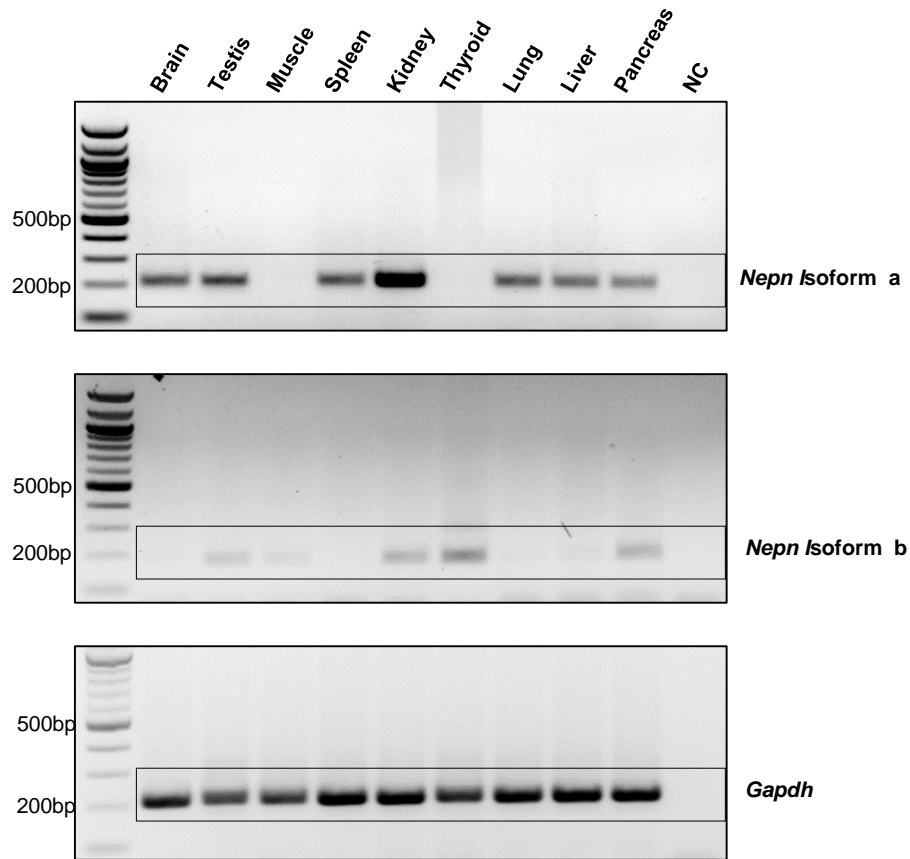

Full gel images for Fig. 3d

NA=Not Applicable

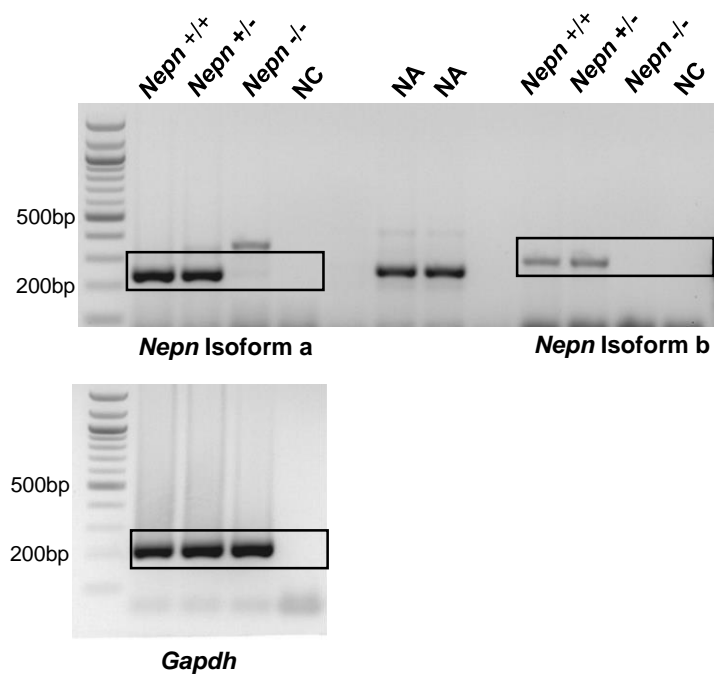



Full gel images for Fig. 5c

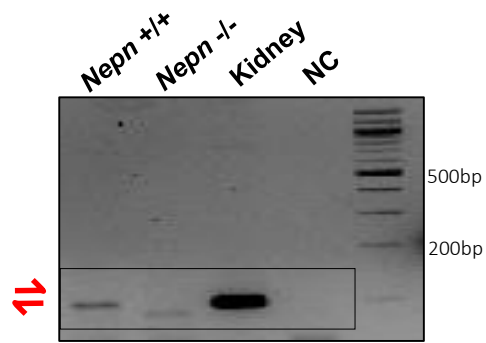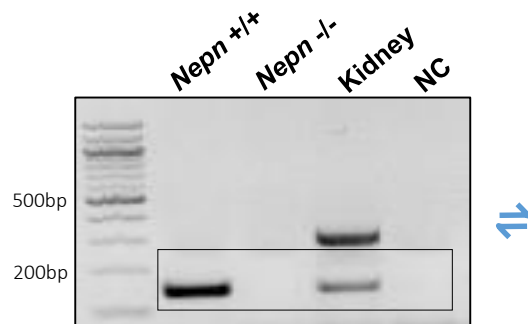

Full gel images for Fig. 6b

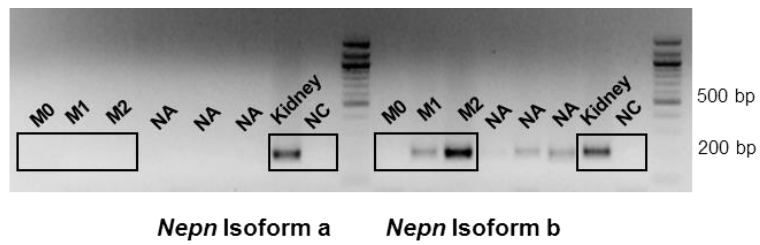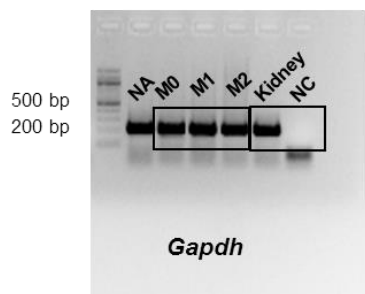

NA=Not Applicable
